# Supplementary material for: Characterization of Tenebrio molitor Larvae Protein Preparations Obtained by Different Extraction Approaches
Source: MDPI journal article supplement (doi:10.3390/foods11233852), 2022-11-29
Supplement: s1 [file s1]

# Characterization of *Tenebrio molitor* larvae protein preparations obtained by different extraction approaches

Alkmini-Anna Gkinali <sup>1</sup>, Anthia Matsakidou <sup>1</sup>, Adamantini Paraskevopoulou <sup>1,\*</sup>

<sup>1</sup> Laboratory of Food Chemistry and Technology, School of Chemistry, Aristotle University of Thessaloniki, 54 124 Thessaloniki, Greece

\* Correspondence: adparask@chem.auth.gr

## Supplementary Material

**Table S1.** Fatty acid profile of *Tenebrio molitor* larvae meal (LM).

| Fatty acids           | %*          |
|-----------------------|-------------|
| 14:0                  | 2.61±0.116  |
| 16:0                  | 21.14±0.449 |
| 16:1                  | 0.43±0.011  |
| 17:0                  | -           |
| 18:0                  | 3.62±0.067  |
| 18:1                  | 44.82±0.341 |
| 18:2 n-6              | 26.35±0.175 |
| 18:3 n-3              | 1.03±0.007  |
| 20:0                  | -           |
| 20:1 n-9              | -           |
| 20:3 n-6              | -           |
| 20:4                  | -           |
| 21:0                  | -           |
| 22:0                  | -           |
| 22:2                  | -           |
| 23:0                  | -           |
| 24:0                  | -           |
| Total SFA**           | 27.37       |
| Total MUFA**          | 4.24        |
| Total PUFA**          | 27.38       |
| Total omega-3 FA      | 1.03        |
| Total omega-6 FA      | 26.35       |
| Ratio omega-6/omega-3 | 25.55       |

\* Values are given as mean ± SD from triplicate determination. \*\* SFA: saturated fatty acids (C6:0, C8:0, C12:0, C13:0, C14:0, C15:0, C16:0, C18:0, C20:0, C23:0), MUFA: mono unsaturated fatty acids (C16:1, C17:1, C18:1, C20:1), PUFA: polyunsaturated fatty acids (C18:2, C18:3, C20:5, C22:2), omega 3: omega 3 fatty acids (C18:3, C20:5) και omega 6: omega 6 fatty acids (C18:2).

**Table S2.** Mineral content of *Tenebrio molitor* larva meal (LM) (mg/100g).

| Minerals | mg/100g *    |
|----------|--------------|
| Cd       | <0.02        |
| Cr       | 0.59±0.170   |
| Cu       | 0.87±0.227   |
| Fe       | 12.70±2.754  |
| Pb       | <0.02        |
| Mn       | 0.88±0.082   |
| Zn       | 23.99±3.096  |
| Al       | 2.08±0.206   |
| Mg       | 239.26±27.98 |
| Ca       | 48.11±7.156  |

\*Values were given as mean ± SD from triplicate determination.

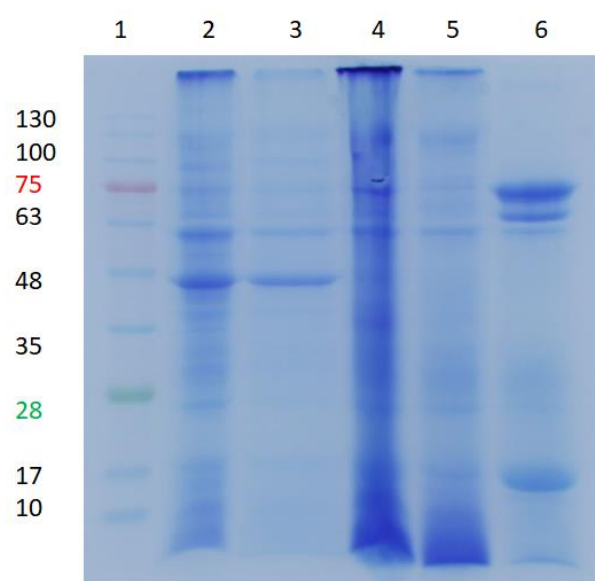

**Figure S1.** The molecular weight distribution of *T. molitor* fractions determined by SDS-PAGE (original version). Notations as in Figure 2.

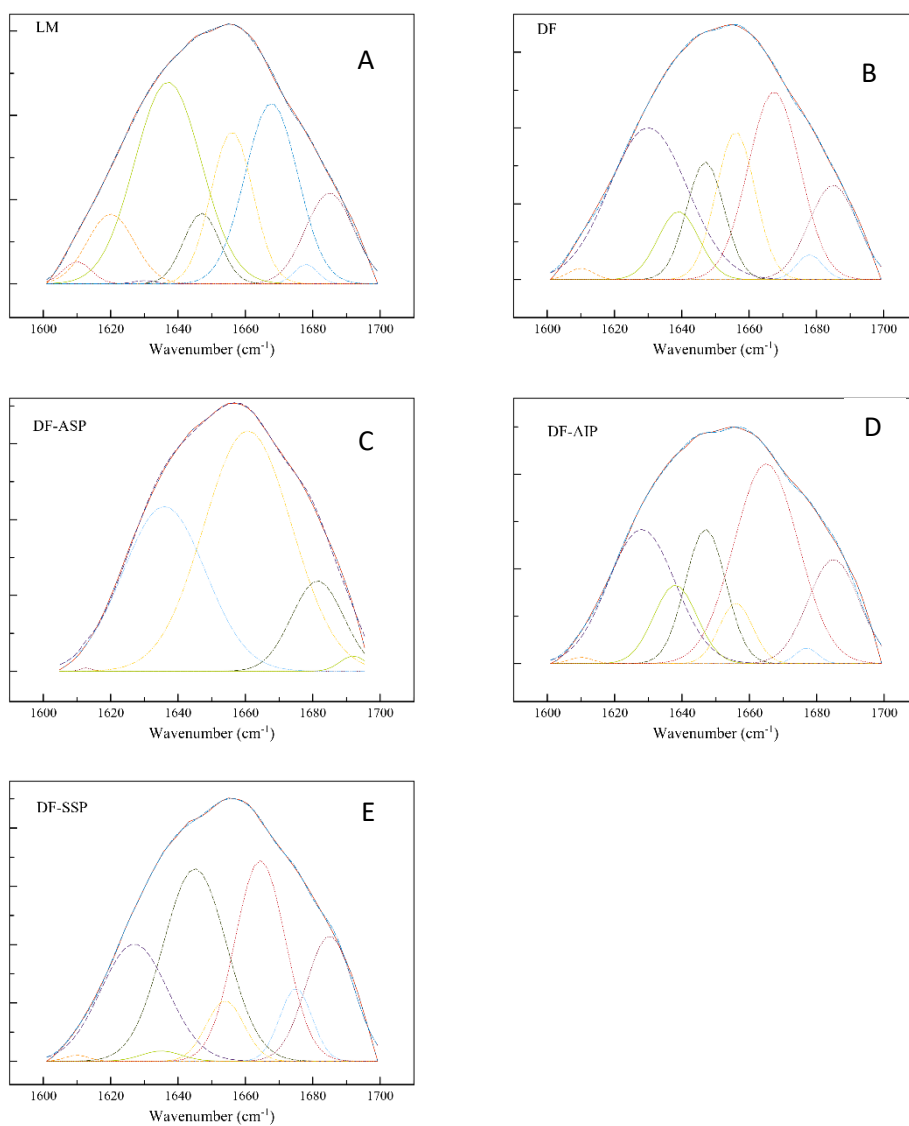

**Figure S2.** Curve fitting of the Amide I region FTIR spectrum for calculating the secondary structure contribution to the protein secondary conformation of **A.** LM, **B.** DF, **C.** DF-ASP, **D.** DF-AIP, **E.** DF-SSP. Notations as in Table 1.
